# Supplementary material for: The Toxic Effects of Sulfoxaflor Induced in Earthworms (Eisenia fetida) under Effective Concentrations
Source: MDPI journal article supplement (doi:10.3390/ijerph17051740), 2020-03-07
Supplement: s1 [file s1]

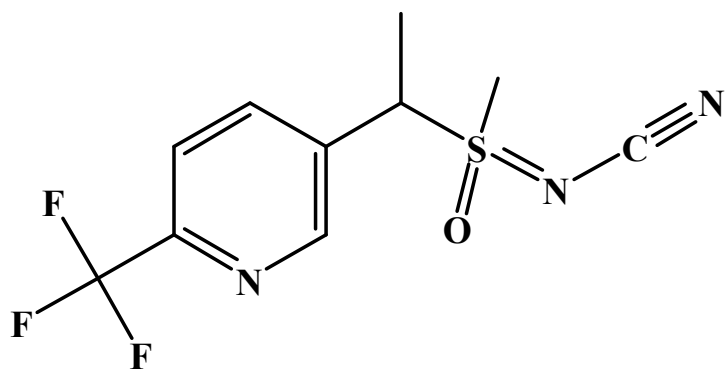

**Figure S1.** The chemical structural formula of sulfoxaflor. The image was completed using the ChemBioDraw software (version 11.0).

**Table S1.** The recovery (%) and RSD (%) of sulfoxaflor in soil at three spiked levels.

| Matrixes | Spiked level (mg/kg) | sulfoxaflor |     |
|----------|----------------------|-------------|-----|
|          |                      | Recovery    | RSD |
| Soil     | 0.010                | 98.0        | 2.7 |
|          | 0.10                 | 97.8        | 3.2 |
|          | 2.0                  | 98.5        | 2.2 |
